# Supplementary material for: One stone, two birds: robust and self-absorption free flexible perovskite scintillators by metal–organic framework encapsulation
Source: Royal Society of Chemistry journal article supplement (doi:10.1039/d4nr05269b), 2025-01-01
Supplement: d4nr05269b1.pdf [file d4nr05269b1.pdf]

## Supporting information

### One stone, two birds: robust and self-absorption free flexible perovskite scintillators by metal organic frameworks encapsulation

Jie zhou<sup>a,b</sup>, Zhouyuanhang Wang<sup>a,b</sup>, Zhongren Shi<sup>b</sup>, Xilin Zhang<sup>a,b</sup>, Lan Yang<sup>a,b</sup>, Yuxuan Jiang<sup>a,c</sup>, Yan  
Kuai<sup>b</sup>, Zhijia Hu<sup>\*a,b</sup>, Siqi Li<sup>\*a,b</sup>

a. School of Physics and Optoelectronic Engineering, Key Laboratory of Opto-Electronic Information Acquisition and  
Manipulation of Ministry of Education, Anhui University, Hefei, 230601, Anhui, P. R. China.

b. Information Materials and Intelligent Sensing Laboratory of Anhui Province, Anhui University, Hefei, 230601, Anhui, P. R.  
China.

c. Center of Free Electron Laser & High Magnetic Field, Anhui University, Hefei, 230601, Anhui, P. R. China

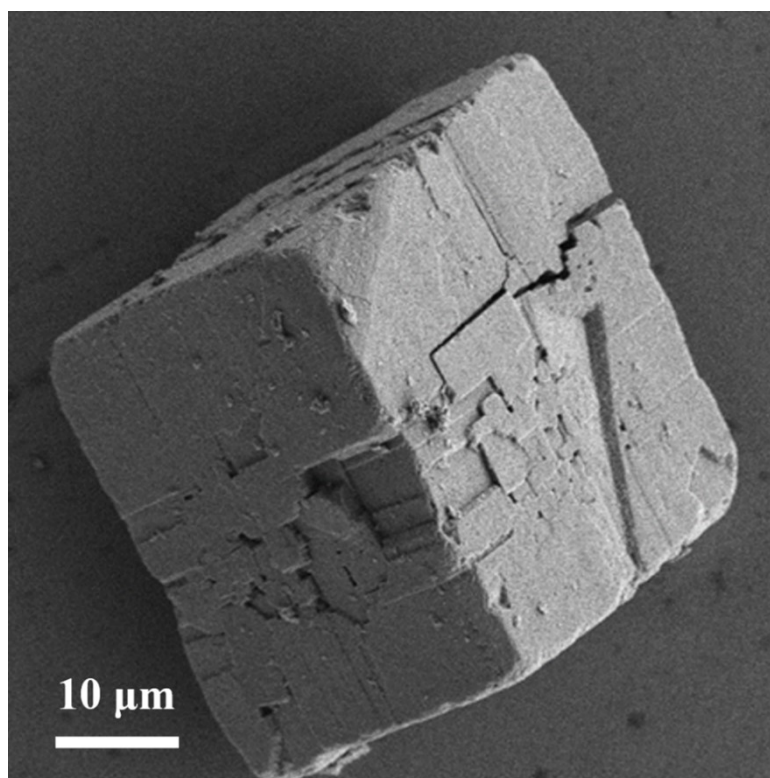

Figure S1: SEM image of MOF-5 crystals.

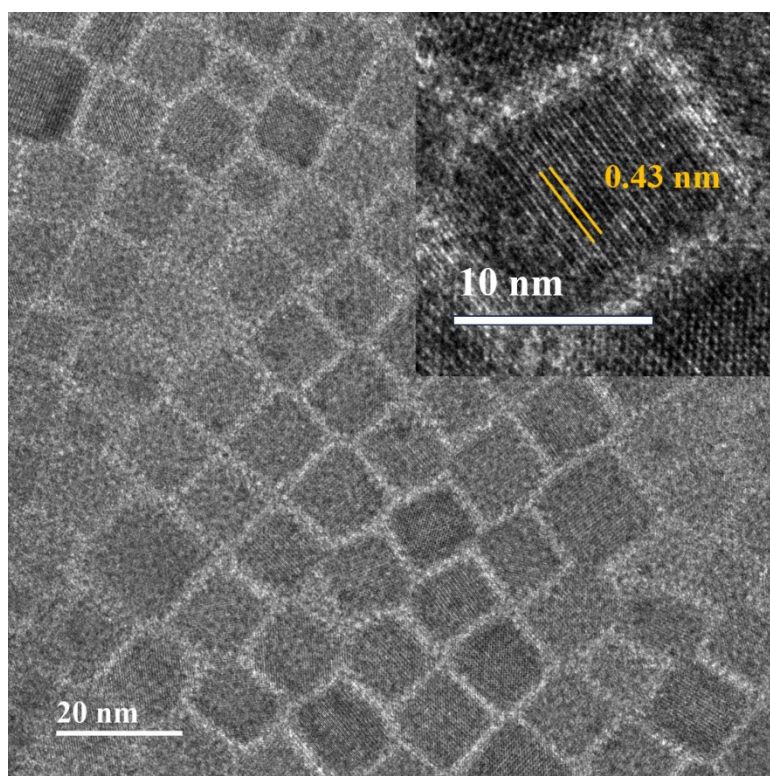

Figure S2: TEM image of CsPbBr<sub>3</sub> NCs with a scale bar of 20 nm. Inset: high-resolution TEM image of CsPbBr<sub>3</sub> NCs with a scale bar of 10 nm.

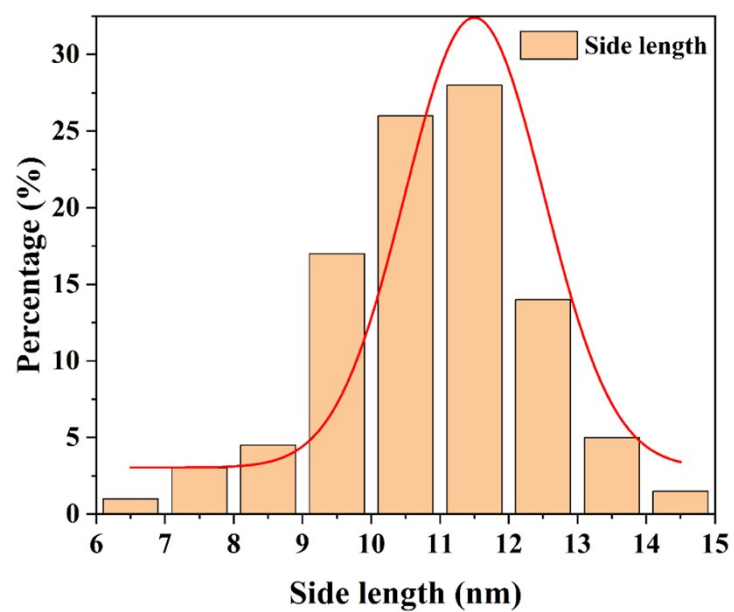

Figure S3: Particle size distribution of CsPbBr<sub>3</sub> NCs.

Table S1: BET specific surface area, specific pore volume, and average pore size of MOF-5 and CsPbBr<sub>3</sub>/MOF-5.

| sample                     | $S_{\text{BET}}$ (m <sup>2</sup> /g) | Pore volume (cm <sup>3</sup> /g) | Average pore size (nm) |
|----------------------------|--------------------------------------|----------------------------------|------------------------|
| MOF-5                      | 598.8                                | 0.3470                           | 5.052                  |
| CsPbBr <sub>3</sub> /MOF-5 | 377.4                                | 0.2370                           | 6.928                  |

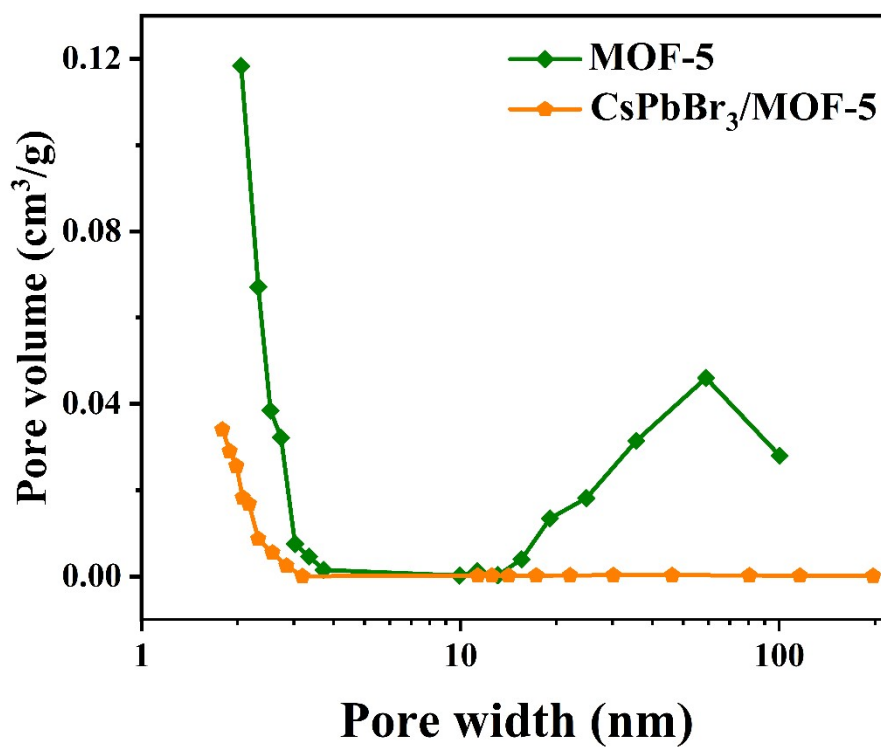

Figure S4: Pore diameter distributions of the MOF-5 and CsPbBr<sub>3</sub>/MOF-5 samples.

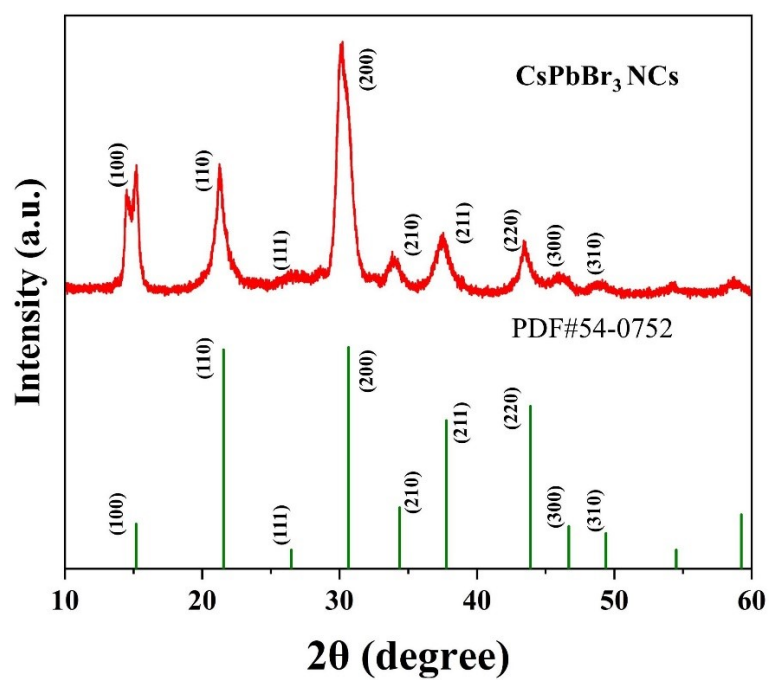

Figure S5: XRD pattern of CsPbBr<sub>3</sub> NCs with the PDF#54-0752.

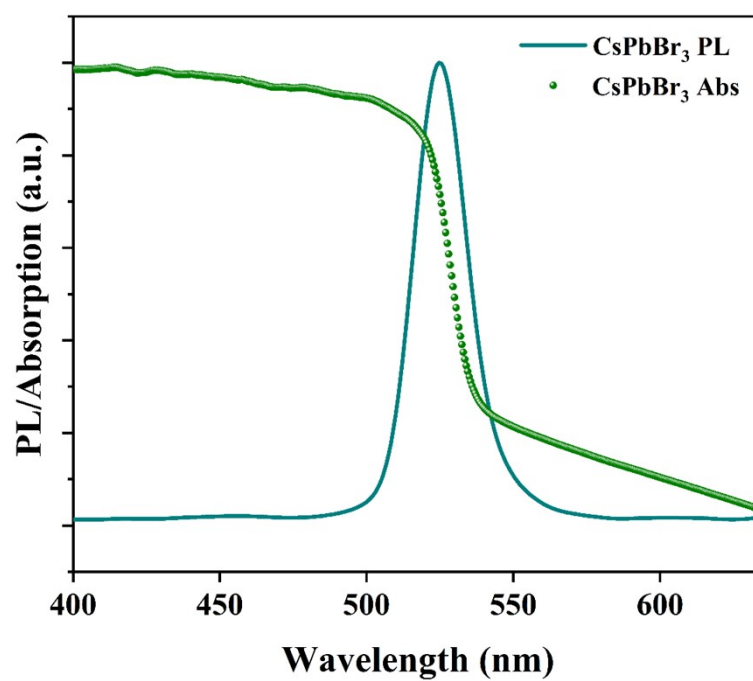

Figure S6: UV-Vis absorption and PL spectra of CsPbBr<sub>3</sub> NCs.

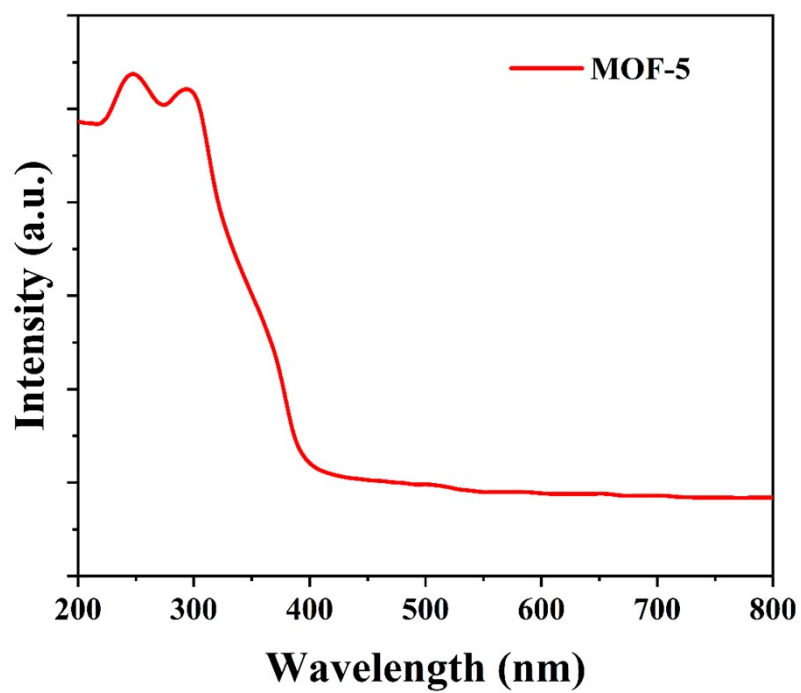

Figure S7: UV-Vis absorption diagram of pure MOF-5.

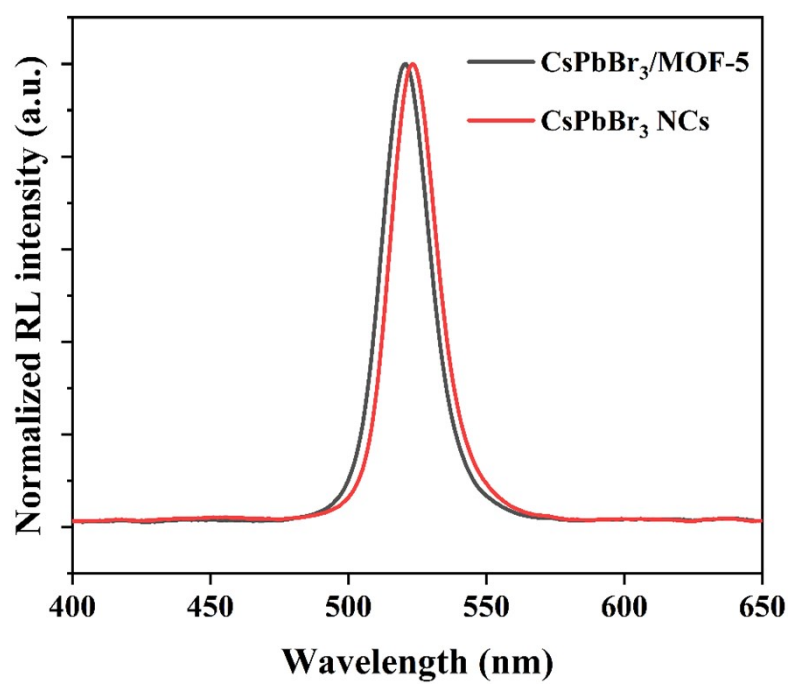

Figure S8: RL spectra of CsPbBr<sub>3</sub> NCs and CsPbBr<sub>3</sub>/MOF-5 composite film.



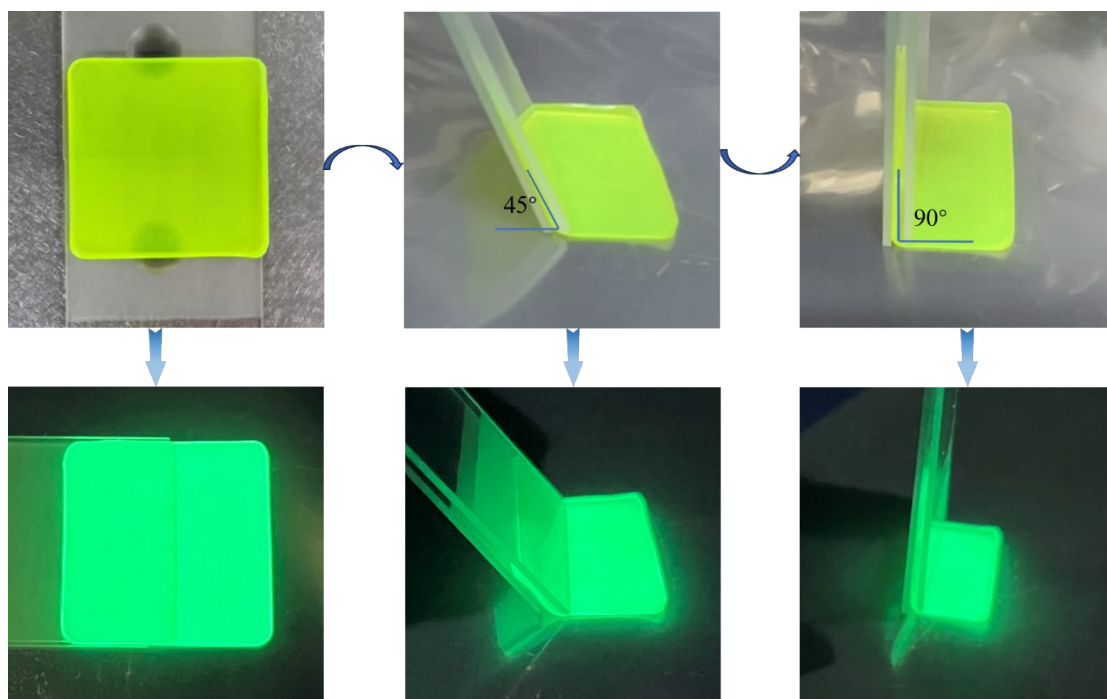

Figure S9: Bending test of CsPbBr<sub>3</sub>/MOF-5 composite film with different degrees.

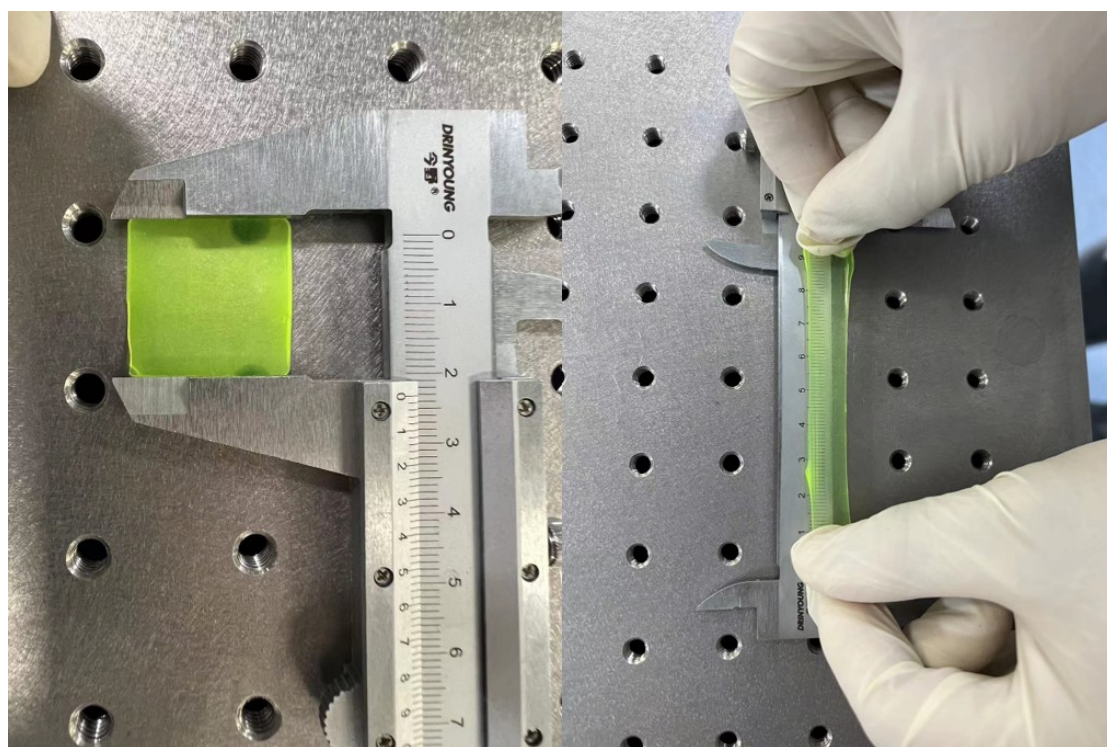

Figure S10: Stretching of CsPbBr<sub>3</sub>/MOF-5 composite film to 5 times its original length.

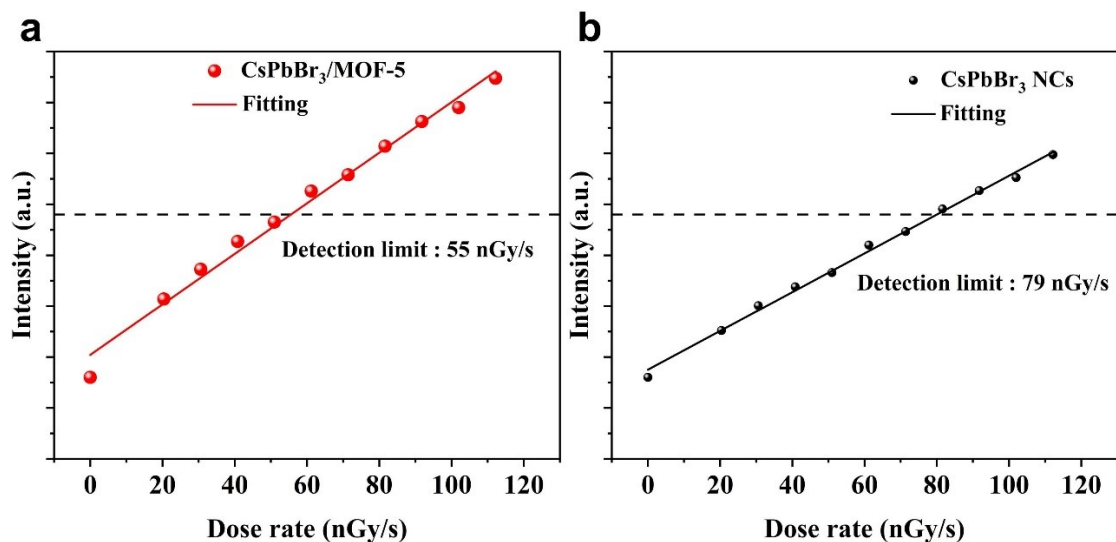

Figure S11: The detection limits of CsPbBr<sub>3</sub>/MOF-5 composite film(a) and CsPbBr<sub>3</sub> NCs film(b) were determined after 1-hour radiation at a dose rate of 2 mGy/s.

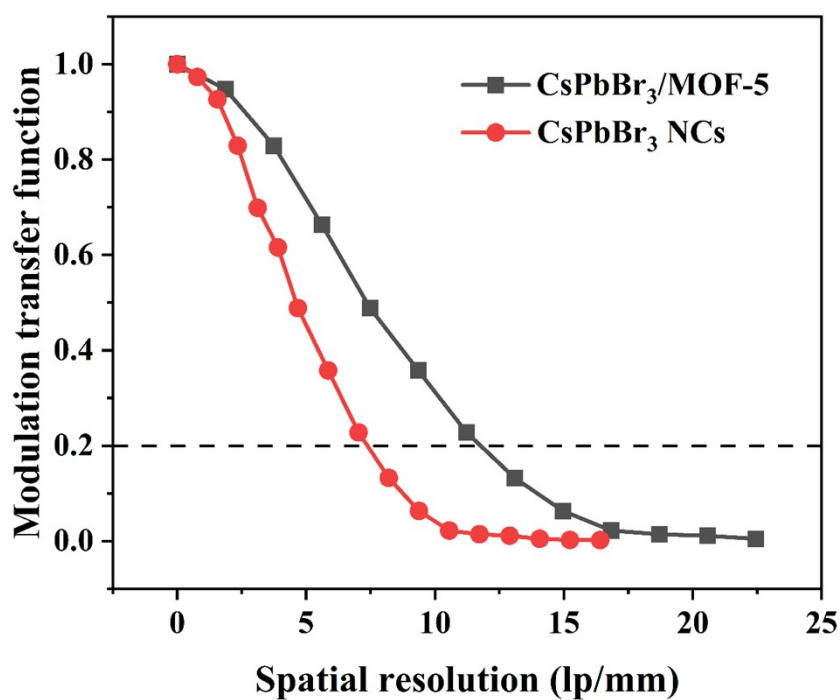

Figure S12: The resolution of CsPbBr<sub>3</sub>/MOF-5 composite film and CsPbBr<sub>3</sub> film were evaluated after 1-hour radiation at a dose rate of 2 mGy/s.



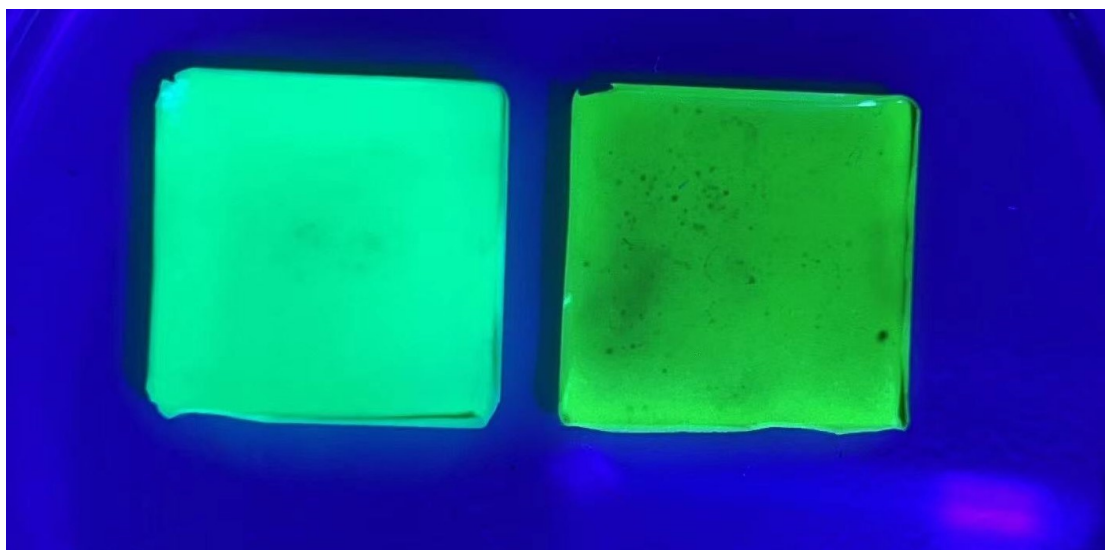

Figure S13: The CsPbBr<sub>3</sub>/MOF-5 composite film (left) and the CsPbBr<sub>3</sub> NCs film (right) were stored under the same conditions for 120 days. Significant damage to the CsPbBr<sub>3</sub> NCs film could be seen under 365 nm UV light.

**Ambient light**

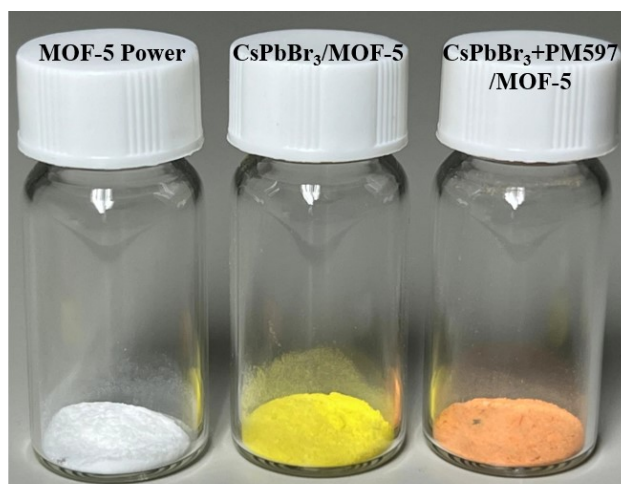

**UV light**

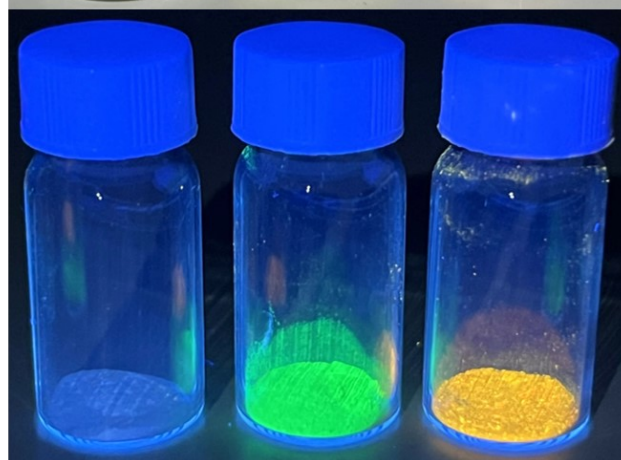

Figure S14: MOF-5 powder, CsPbBr<sub>3</sub>/MOF-5 powder, and CsPbBr<sub>3</sub>+PM597/MOF-5 powder under ambient light and UV light.

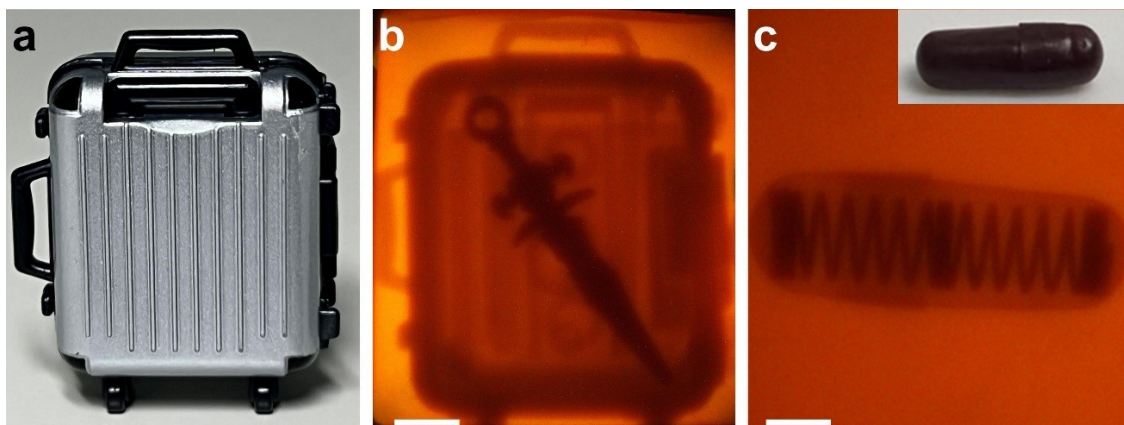

Figure S15: (a-b) Photographs of a miniature traveling case (containing a metal sword) and photographs of its X-ray image, scale bar is 1 cm. (c) Capsule (containing a spring) photographed through CsPbBr<sub>3</sub>/PM597/MOF-5 composite film and photographs of its X-ray image, scale bar is 3 mm.

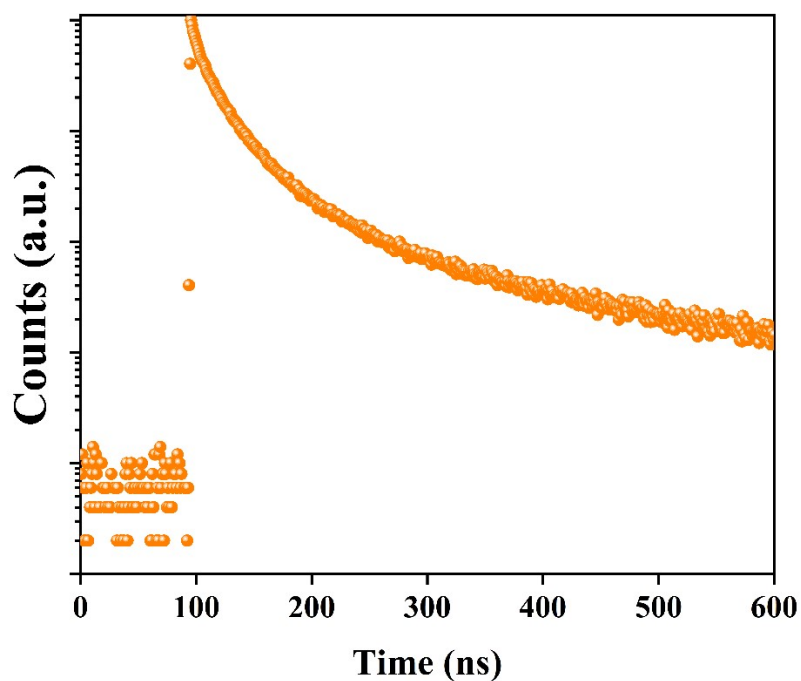

Figure S16: Photoluminescence decay curves of CsPbBr<sub>3</sub>/MOF-5 composites at the center wavelength under laser excitation at 373 nm.

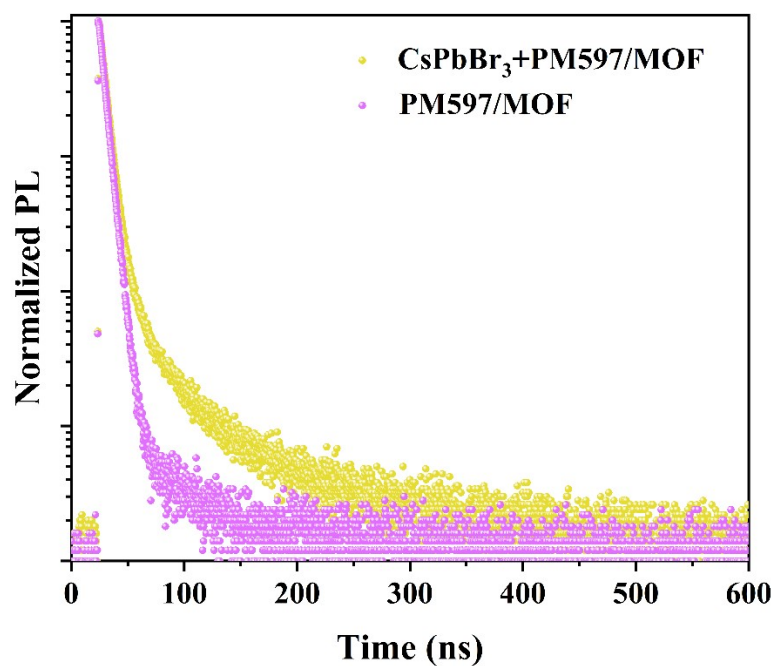

Figure S17: Photoluminescence decay curves of CsPbBr<sub>3</sub>+PM597/MOF and PM597/MOF.

Table S2. Fitting parameters of CsPbBr<sub>3</sub>/MOF, CsPbBr<sub>3</sub>+PM597/MOF, and PM597.

| Sample                         | $\tau_1$ (ns) | $\tau_2$ (ns) | $A_1$ | $A_2$ | $\tau_{\text{avg}}$ (ns) |
|--------------------------------|---------------|---------------|-------|-------|--------------------------|
| CsPbBr <sub>3</sub> /MOF       | 70            | 12.9          | 0.89  | 0.11  | 35.78                    |
| CsPbBr <sub>3</sub> +PM597/MOF | 53            | 5.3           | 0.015 | 0.985 | 11.58                    |
| PM597/MOF                      | 5.32          | 5.32          | 0.003 | 0.997 | 5.32                     |

## Photoluminescence quantum yield (PLQY)

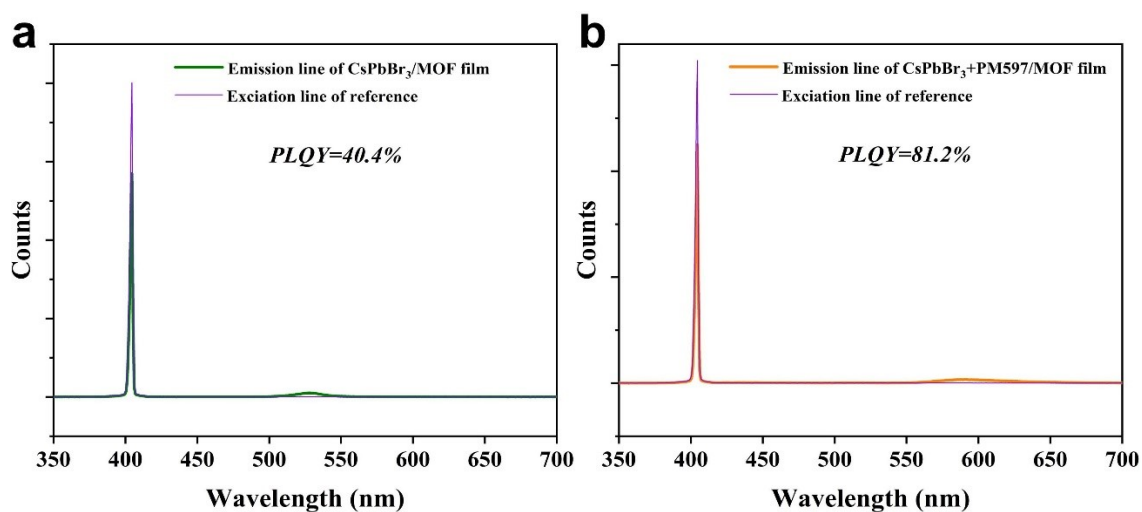

Figure S18: The PLQY of CsPbBr<sub>3</sub>/MOF-5 film and CsPbBr<sub>3</sub>+PM597/MOF-5 film.

We measured the PLQY of CsPbBr<sub>3</sub>/MOF-5 film and CsPbBr<sub>3</sub>+PM597/MOF-5 film using an integrating sphere as shown in Table S3. PLQY is defined as the ratio of photon numbers emitted to the number of photons absorbed<sup>1, 2</sup>:

$$PLQY = \frac{n(\text{photons emitted})}{n(\text{photons absorbed})} * 100\% \#(1)$$

**Table S3. Comparison of the PLQY for different samples**

| Sample                              | Integration area of absorption (math.) | Integration area of emission (math.) | PLQY(%) |
|-------------------------------------|----------------------------------------|--------------------------------------|---------|
| CsPbBr <sub>3</sub> /MOF film       | 15838                                  | 6393                                 | 40.4    |
| CsPbBr <sub>3</sub> +PM597/MOF film | 12138                                  | 9853                                 | 81.2    |

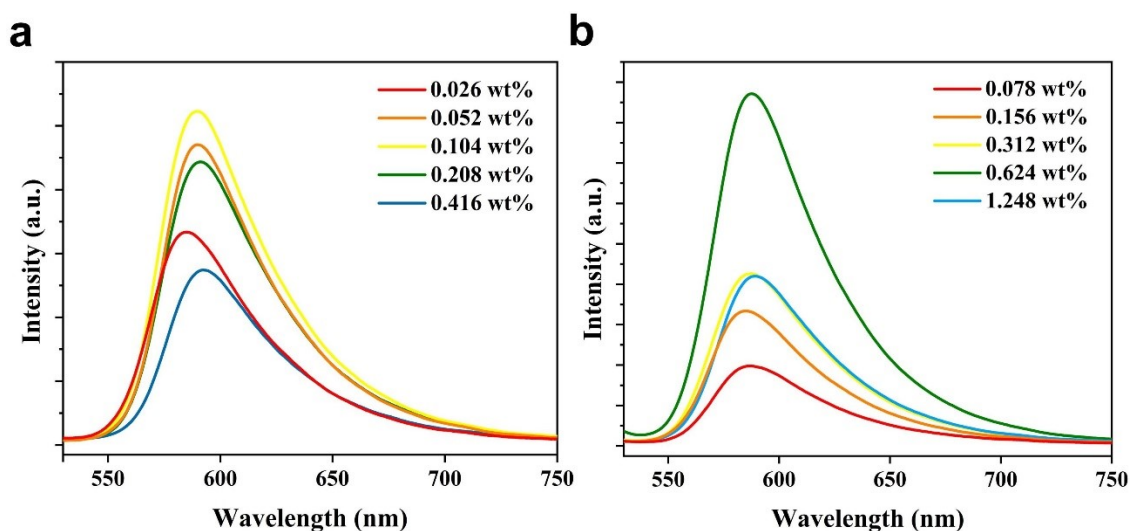

Figure S19: (a) RL spectra evolution of CsPbBr<sub>3</sub> + PM597 solid films under X-ray with PM597 concentration from 0.026 to 0.416 wt%; (b) RL spectra evolution of CsPbBr<sub>3</sub> + PM597/MOF-5 solid films under X-ray with PM597 concentration from 0.078 to 1.248 wt%.

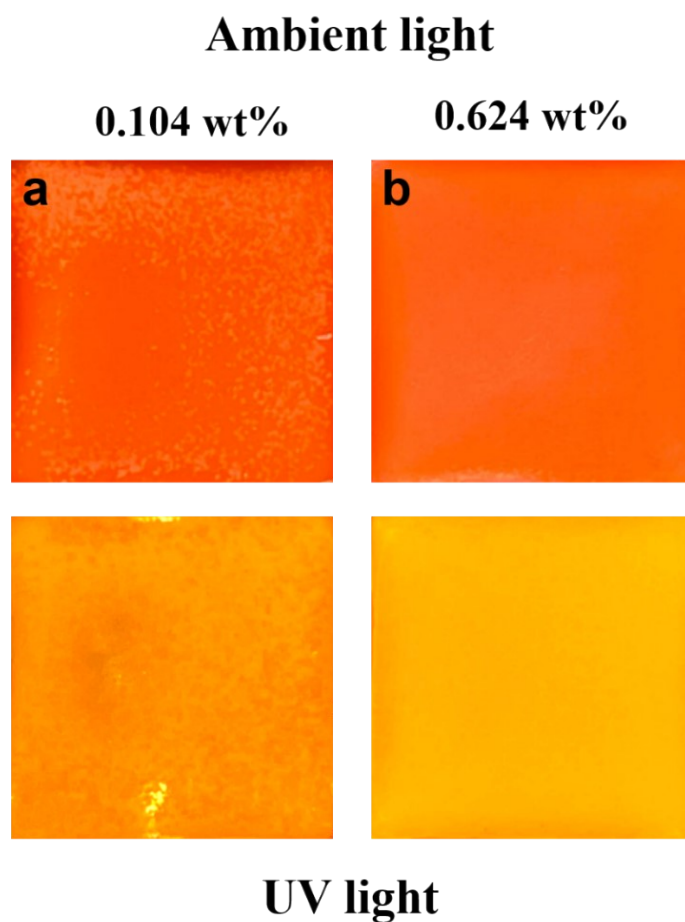

Figure S20: Comparison of physical images of CsPbBr<sub>3</sub> + PM597 and CsPbBr<sub>3</sub> + PM597/MOF-5 films. Sample a is a CsPbBr<sub>3</sub> + PM597 film with a PM597 concentration of 0.104 wt%, while sample b is a CsPbBr<sub>3</sub> + PM597/MOF-5 film with a PM597 concentration of 0.624 wt%. The upper images were captured under ambient light, and the lower images were taken under UV light (365 nm).

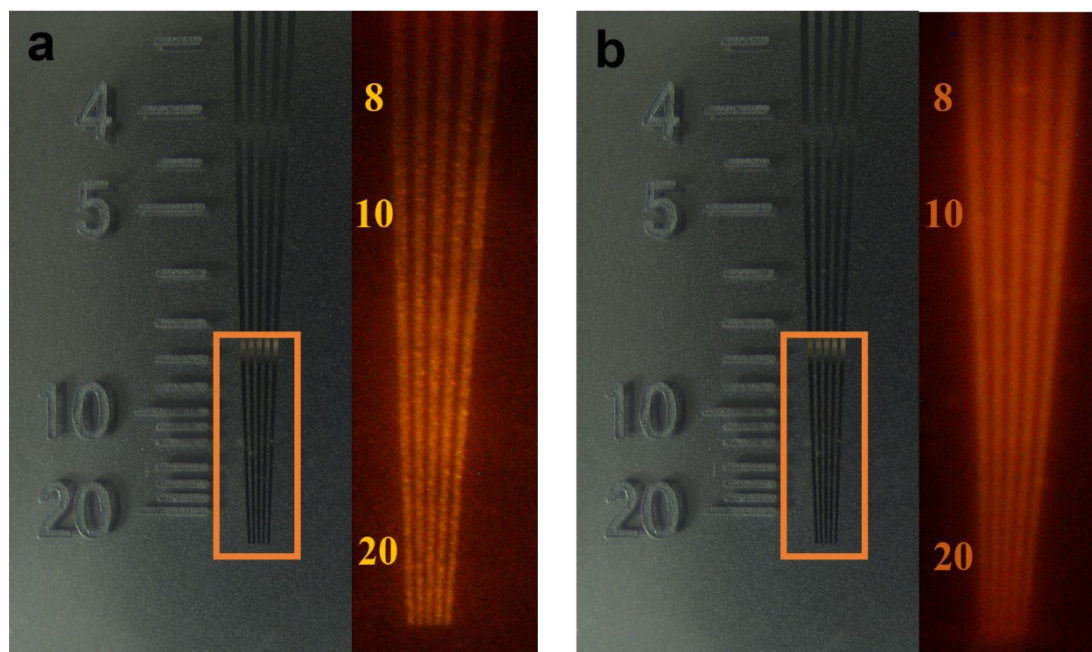

Figure S21: The standard X-ray test-pattern plate imaging of (a) CsPbBr<sub>3</sub>+PM597/MOF-5 composite film and (b) CsPbBr<sub>3</sub>+PM597 composite film.

## References

1. J.-X. Wang, O. Shekhah, O. M. Bakr, M. Eddaoudi and O. F. Mohammed, *Chem.*, 2024.
2. S. Tian, Z. Shi, Y. Sun, P. Zhang, S. Wu, D. Chen, P. Xiong, Q. Qian and Z. Yang, *Laser Photonics Rev.*, 2022, **16**, 2200020.
